# Supplementary material for: Sex-Specific Association between Serum 25-Hydroxyvitamin D and Metabolic Risk Factors in T2DM Patients
Source: Hindawi journal article supplement (doi:10.1155/2020/9238719), 2020-06-04
Supplement: f1 [file 9238719.f1.pdf]

**Supplemental table 1: Comparison of the vitamin D status according sex groups.**

|        | Deficiency N (%) | Insufficiency N (%) | Sufficiency N |
|--------|------------------|---------------------|---------------|
| Male   | 83 (25.9)        | 167 (52.0)          | 71 (22.1)     |
| Female | 64 (34.4)        | 84 (45.2)           | 38 (20.4)     |
| Total  | 147 (29.0)       | 251 (49.5)          | 109(21.5)     |

Vitamin D status defined as: Deficiency < 10ng/mL; insufficiency  $\geq$  10 ng/mL to < 20 ng/mL; and sufficiency  $\geq$  20 ng/mL.  
 $\chi^2=4.247$ ,  $P_{\text{trend}}=0.120$
